# Supplementary material for: Luminescence properties of Pt(ii) complexes containing polypyridine ligands with extended aromatic moieties
Source: Royal Society of Chemistry journal article supplement (doi:10.1039/b804574g), 2008-01-01
Supplement: b804574g.pdf [file b804574g.pdf]

### Supplementary Information to

### Luminescence properties of Pt(II) complexes containing polypyridine ligands with extended aromatic moieties

Fabio Cucinotta, Maria Letizia Di Pietro, Fausto Puntoriero, Antonino Giannetto, Sebastiano Campagna, and Matteo Cusumano.

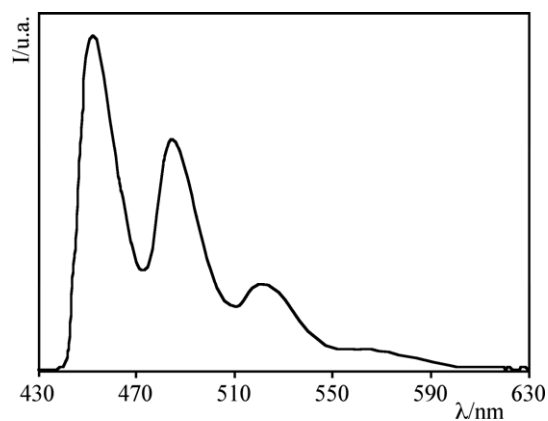

**FIGURE S1** - Luminescence spectrum of **1** in butyronitrile rigid matrix at 77 K.

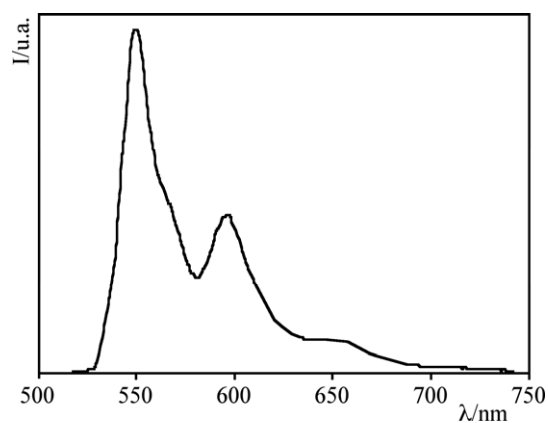

**FIGURE S2** - Luminescence spectrum of **6** in butyronitrile rigid matrix at 77 K.

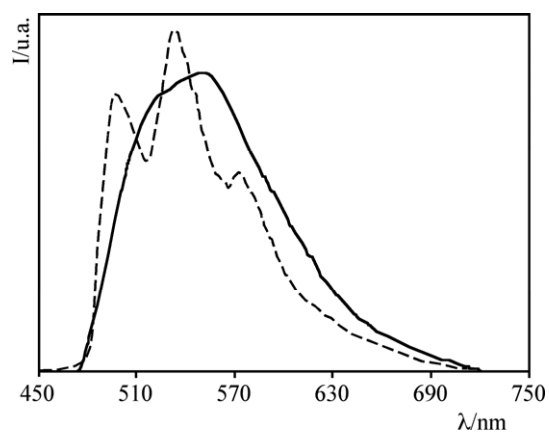

**FIGURE S3** - Luminescence spectra of **8** in acetonitrile fluid solution at 298 K (solid) and in butyronitrile rigid matrix at 77 K (dashed).

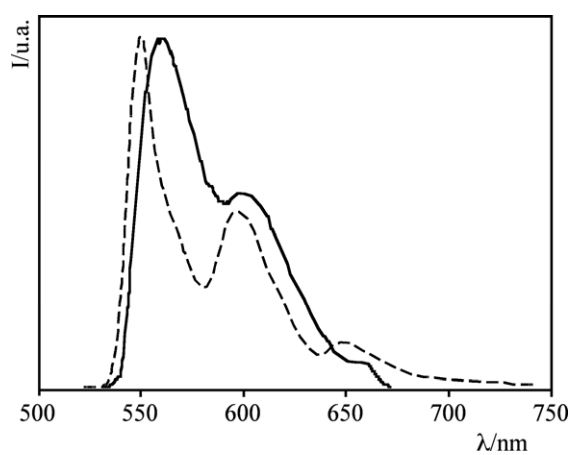

**FIGURE S4** - Luminescence spectra of **10** in acetonitrile fluid solution at 298 K (solid) and in butyronitrile rigid matrix at 77 K (dashed).

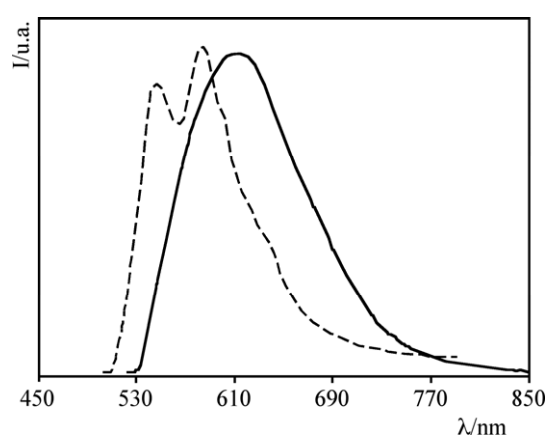

**FIGURE S5** - Luminescence spectra of **11** in acetonitrile fluid solution at 298 K (solid) and in butyronitrile rigid matrix at 77 K (dashed).
